# Supplementary material
Source: Springer Nature journal article supplement (https://www.springermedizin.de/resource/supplementary/13051_2010_114_MOESM1_ESM.pdf/9669968)

## CRP

CRP  $\leq$  5mg/LCRP  $>$  5mg/L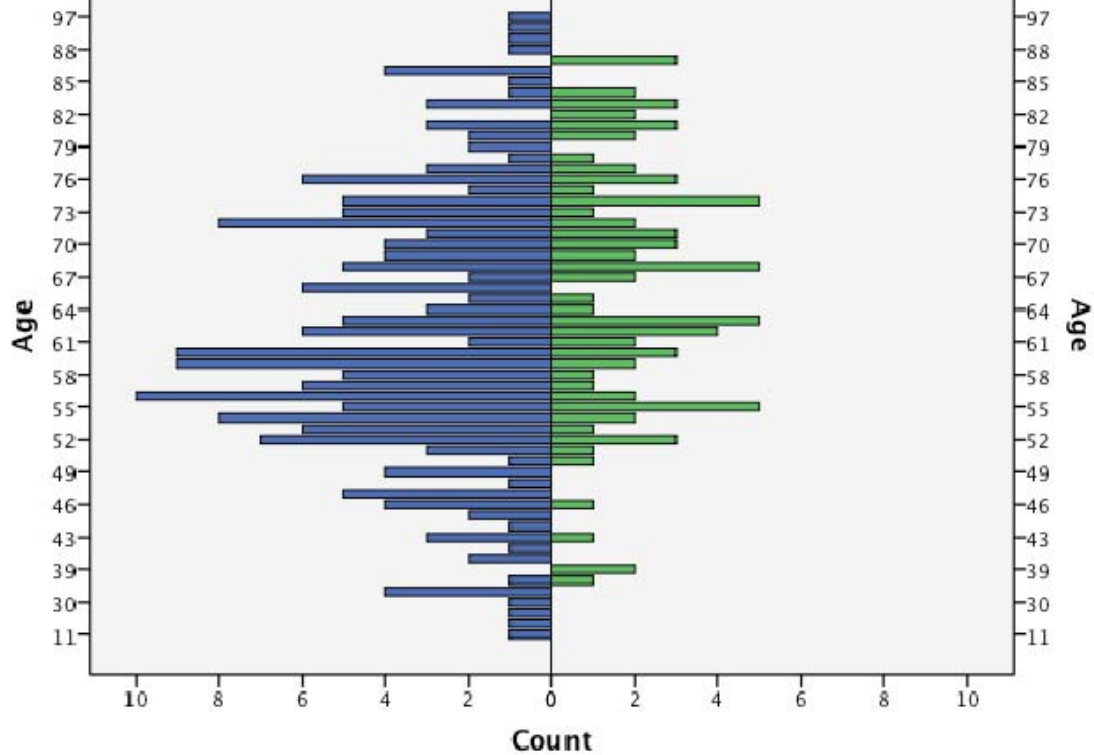

Supplement: MOESM1 [file 9669968]
